# Supplementary material
Source: PubMed Central journal article supplement (PMC6549468)
Supplement: MCB.00099-19-s0005.pdf [file MCB.00099-19-s0005.pdf]

1 **SUPPLEMENTARY FIGURE LEGENDS**

2 **Supplementary Figure 1.** NOL12 regulates fibrillarin and nucleolin protein levels  
3 and nucleolar area. **(A)** NOL12 (green) and tubulin (grey) immunostaining of mock  
4 and NOL12-depleted (siNOL12) fibroblasts. DNA was stained with DAPI (blue).  
5 Scale bars, 10 $\mu$ m. **(B)** Western blot analysis of NOL12 protein levels in cell extracts  
6 from mock and siNOL12 fibroblasts. Tubulin levels were used as loading control.  
7 Values are mean  $\pm$  SD from three independent experiments and normalized to mock  
8 controls. \*\* $p \leq 0.01$  by Mann-Whitney statistical test. **(C)** qPCR analysis of *NOL12*  
9 transcript levels in mock and siNOL12 fibroblasts. *G6PD* was used as housekeeping  
10 gene. Values are mean  $\pm$  SD from four independent experiments and normalized to  
11 mock controls. \* $p \leq 0.05$  by Mann-Whitney statistical analysis. **(D)** Western blot  
12 analysis of fibrillarin protein levels. Tubulin levels were used as loading control.  
13 Values are mean  $\pm$  SD from four independent experiments and normalized to mock  
14 controls. \* $p \leq 0.05$  by Mann-Whitney statistical test. **(E)** Western blot analysis of  
15 nucleolin protein levels. Tubulin levels were used as loading control. Values are mean  
16  $\pm$  SD from four independent experiments and normalized to mock controls. \* $p \leq 0.05$   
17 by Mann-Whitney statistical test. **(F)** Nucleolar area ( $\mu\text{m}^2$ ) in mock, siNOL12 and  
18 siXRN2 cells. Values are mean  $\pm$  SD of n=total number of cells. \*\*\*\* $p \leq 0.0001$  by  
19 Kruskal-Wallis statistical test. **(G)** Nuclear area ( $\mu\text{m}^2$ ) in mock, siNOL12 and siXRN2  
20 cells. Values are mean  $\pm$  SD of n= total number of cells. \*\*\*\* $p \leq 0.0001$  by Kruskal-  
21 Wallis statistical test.

22

23 **Supplementary Figure 2.** RPL11 is required for Actinomycin D-induced p53  
24 stabilization in human dermal fibroblasts. **(A)** p53 and p21 protein levels in cell  
25 extracts from neonatal fibroblasts incubated with 0nM, 8nM and 16nM Actinomycin

26 D (ActD) for 4 hours. Tubulin was used as loading control in the immunoblotting. In  
27 the graph, bars are the protein levels normalized to the untreated control from a single  
28 experiment. **(B)** Western blot analysis of p53 and RPL11 protein levels in cell extracts  
29 from control and siRpl11 cells treated with 8nM Actinomycin D (ActD) for 4 hours.  
30 Tubulin was used as the loading control.

31

32 **Supplementary Figure 3.** NOL12 repression inhibits cell proliferation in an  
33 apoptosis-independent manner. **(A)** Immunostaining of Ki67 cell proliferation marker  
34 (red) in mock, siNOL12, siP53 and siNOL12+siP53 human dermal fibroblasts. DAPI  
35 staining was used for nuclei masking (white solid lines). Scale bars, 10 $\mu$ m. **(B)** Cell  
36 cycle duration was measured as the interval between mother cell mitosis and daughter  
37 cell mitosis over three generations (1<sup>st</sup> – 3<sup>rd</sup> Gen), in mock, siNOL12, siP53 and  
38 siNOL12+siP53 fibroblast cultures. Each dot represents a single cell. n= total number  
39 of cells analyzed. n.s., not significant. **(C)** Representative flow cytometry cell cycle  
40 profiles from control mock, siNOL12, siP53 and siNOL12+siP53 cell cultures. **(D)**  
41 Western blot analysis of the apoptotic marker cleaved-caspase 3 in cell extracts from  
42 mock, siNOL12 and siNOL12+siP53 fibroblasts. Extracts from cells treated with  
43 DMSO or 5 $\mu$ M staurosporine (STS) for 4 hours were used as negative and positive  
44 controls, respectively. Tubulin was used as the loading control.

45

46 **Supplementary Figure 4.** Quantification of senescence markers in naturally aged and  
47 replicative senescent fibroblasts. **(A)** Percentage of Ki67 negative cells in neonatal  
48 (Neo2) vs. elderly (Old; 77y, 84y, 85y and 87y average), as well as in neonatal low vs.  
49 high passage (Neo1 P<9 and Neo1 P>25) fibroblast cultures. Values are mean  $\pm$  SD

50 from at least two independent experiments. \*\*\*\* $p \leq 0.0001$  by  $\chi^2$ -square statistical test.  
51 **(B)** Percentage of cells double positive for p21/53BP1 staining. Values are mean  $\pm$  SD  
52 from two independent experiments. \*\*\*\* $p \leq 0.0001$  by  $\chi^2$ -square statistical test. **(C)**  
53 Percentage of SA- $\beta$ -galactosidase (SA- $\beta$ -Gal) positive cells. Values are mean  $\pm$  SD  
54 from two independent experiments. \*\*\*\* $p \leq 0.0001$  by  $\chi^2$ -square statistical test. **(D)**  
55 Nucleolar area ( $\mu\text{m}^2$ ). Values are mean  $\pm$  SD. \*\*\*\* $p \leq 0.0001$  by Kruskal-Wallis  
56 statistical test. **(E)** Nuclear area ( $\mu\text{m}^2$ ). Values are mean  $\pm$  SD. \*\*\*\* $p \leq 0.0001$  by  
57 Kruskal-Wallis statistical test. In all graphs (A-E), values were normalized to Neo (red  
58 bars) or Neo1 (dark grey bar) and  $n$ = total number of cells analyzed.

59

60 **Supplementary Figure 5.** Overexpression of NOL12 in elderly donor cells negligibly  
61 impacts nucleolar stress and senescence phenotypes. **(A)** NOL12 immunoblotting in  
62 cell extracts from neonatal (Neo1), 84-year-old (84y) and 84-year-old fibroblasts  
63 overexpressing NOL12 (84y+NOL12 OE). Tubulin was used as the loading control.  
64 **(B)** Percentage of Ki67 negative cells in Neo1, 84y and 84y+NOL12 OE cell cultures.  
65 Values are mean  $\pm$  SD from two independent experiments. \*\*\*\* $p \leq 0.0001$  by  $\chi^2$ -  
66 square statistical test. **(C)** Scatter plot of the mean pixel intensity of fibrillar nuclear  
67 levels in Neo1, 84y and 84y+NOL12 OE nuclei. Each dot represents a single cell.  
68 Horizontal lines represent the mean. \*\* $p \leq 0.01$  and \*\*\* $p \leq 0.001$  by Kruskal-Wallis  
69 statistical test. **(D)** Ratio between nucleolar and nuclear areas in neonatal Neo1, 84y  
70 and 84y+NOL12 OE cells. Values are mean  $\pm$  SD and normalized to 84y mean value.  
71 \*\*\* $p \leq 0.001$  by Kruskal-Wallis statistical test. **(E)** Distribution curves of the  
72 percentage of Neo1, 84y and 84y+NOL12 OE cells exhibiting a total number of  
73 nucleoli as indicated. **(F)** Percentage of SA- $\beta$ -galactosidase (SA- $\beta$ -Gal) positive cells  
74 in Neo1, 84y and 84y+NOL12 OE cell cultures. Values are mean  $\pm$  SD from two

75 independent experiments. \*\*\*\* $p \leq 0.0001$  by  $\chi^2$ -square statistical test. n=total number  
 76 of cells analyzed in each experiment.

77

78 **Supplementary Movies 1-4. Related to Figure 3.** Long-term phase-contrast live-cell  
 79 imaging (Movies 1-4) of mock, siNOL12, siP53 and siNOL12+siP53 cell cultures,  
 80 respectively. Movie records started 28 hours and ended 70 hours after post-transfection.  
 81 Images were acquired every 2.5 min. Scale bars, 100 $\mu$ m.

82

83 **Supplementary Table 1.** Human dermal fibroblasts (HDFs) used in this study.

84

| <i>HDFs (age)</i> | <i>Reference, Repository</i>     | <i>Referred as</i> |
|-------------------|----------------------------------|--------------------|
| <i>Neonatal</i>   | DFM021711A, Zen Bio              | Neo1               |
| <i>1 day</i>      | GM21811, Coriell Cell Repository | Neo2               |
| <i>77 years</i>   | AG07135, Coriell Cell Repository | 77y                |
| <i>84 years</i>   | AG11488, Coriell Cell Repository | 84y                |
| <i>85 years</i>   | AG09271, Coriell Cell Repository | 85y                |
| <i>87 years</i>   | AG10884, Coriell Cell Repository | 87y                |

85

86 **Supplementary Table 2.** Sequences of siRNAs used in this study.

| <i>mRNA targets</i> | <i>Sequence 5'-3'</i>                                                                                                                                                             |
|---------------------|-----------------------------------------------------------------------------------------------------------------------------------------------------------------------------------|
| <i>NOL12</i>        | (SASI_Hs01_00047859)<br>CAGAUGAGCUGGACCGGUU[dT][dT] (sense)<br>AACCGGUCCAGCUCAUCUG[dT][dT] (antisense)                                                                            |
| <i>P53</i>          | (SASI_Hs02_00302766)<br>GAGGUUGGCUCUGACUGUA[dT][dT] (sense)<br>UACAGUCAGAGCCAACCUC[dT][dT] (antisense)                                                                            |
| <i>RPL11</i>        | CGCGAGCAGCCAAGGUGUUGGAGCA[dT][dT] (sense)<br>UGCUCCAACACCUUGGCUGCUCGCG[dT][dT] (antisense)                                                                                        |
| <i>XRN2</i>         | siRNA 1: AAGAGUACAGAUGAUGAUG[dT][dT] (sense)<br>CAUGAUAUCUGUACUCUU[dT][dT] (antisense)<br>siRNA 2: GGGAAGAAAUAUUGGCAAA[dT][dT] (sense)<br>UUUGCCAAUAUUUCUCCCC[dT][dT] (antisense) |

87

88 **Supplementary Table 3.** Sequences of primers used in qPCR experiments.

| Gene           | Sequence (5'-3')       |                           |
|----------------|------------------------|---------------------------|
|                | Forward                | Reverse                   |
| <i>G6PD</i>    | AACATCGCCTGCGTTATCCTC  | ACGTCCCGGATGATCCCAA       |
| <i>NOL12</i>   | GGCCGAGGCTCGTTCTTAG    | TGCCTTCTTTCGCTCGACC       |
| <i>CDKN1A</i>  | TGGACCTGGAGACTCTCAGG   | CGGATTAGGGCTTCCTCTTGG     |
| <i>MMP1</i>    | AGCGTGTGACAGTAAGCTAACC | AACTCCGGGTAGAAGGGATTG     |
| <i>CXCL8</i>   | GCCTTCCTGATTCTGCAGCT   | GCACTGACATCTAAGTTCTTTAGCA |
| <i>TSPAN13</i> | CGCCATGTGCTCCAATCATAG  | GTAGGTCAGCCAAACACCCA      |
| <i>TBP</i>     | GAGCCAAGAGTGAAGAACAGTC | GCTCCCCACCATATTCTGAATCT   |

89

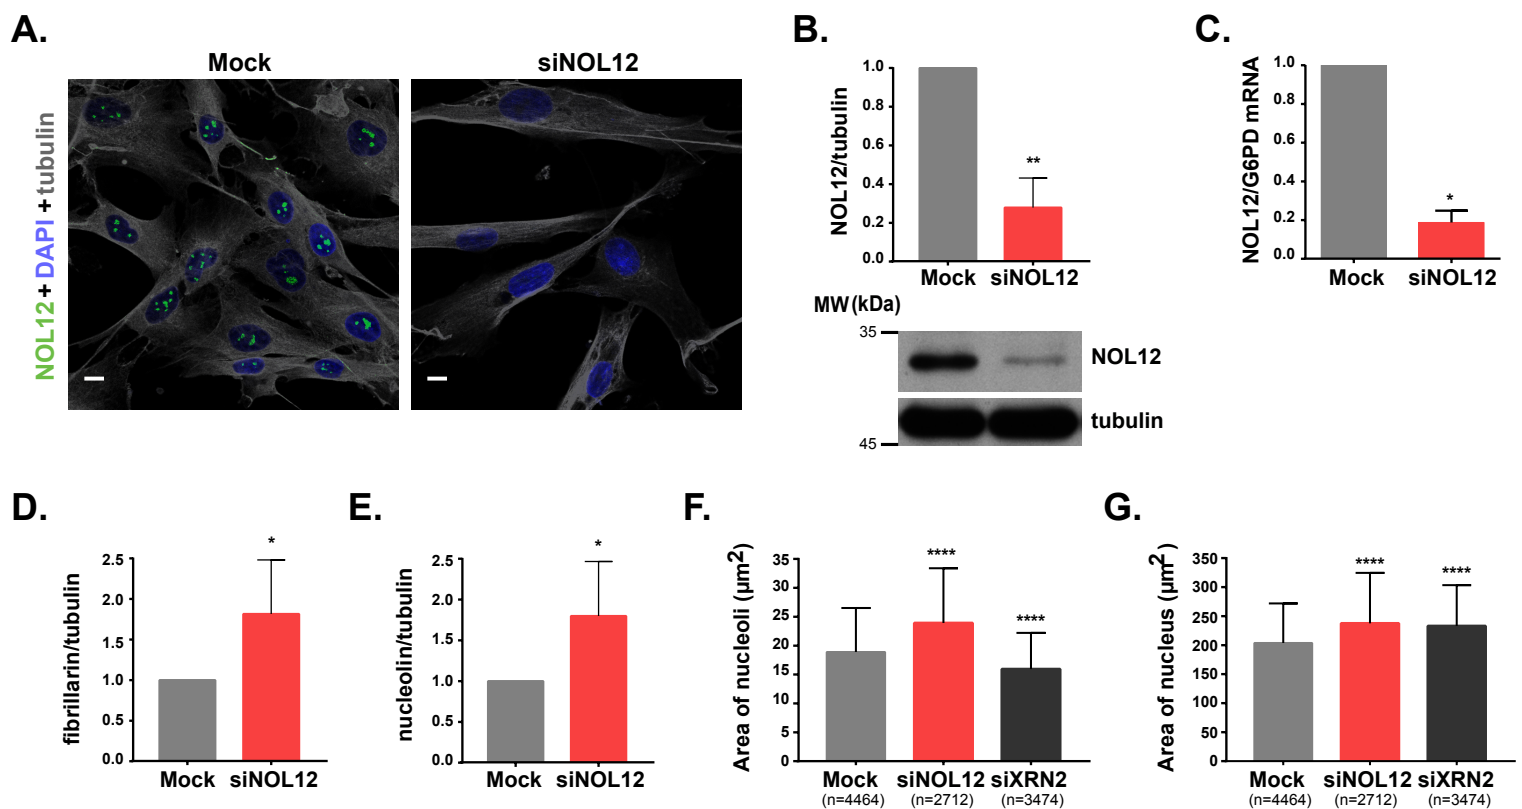

**Supplementary Figure 1. Pinho M et al, 2018**

**A.**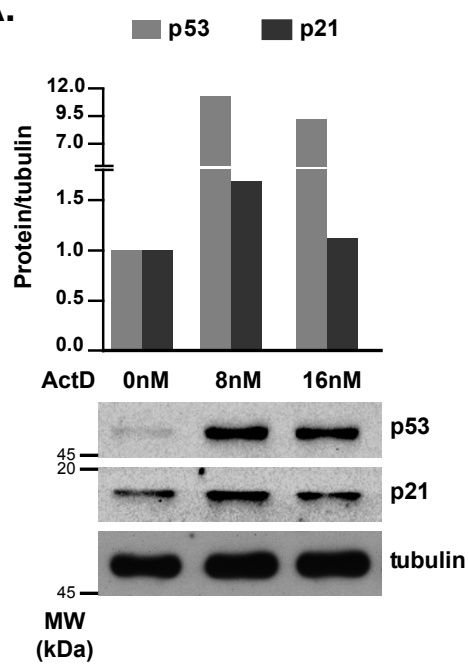**B.**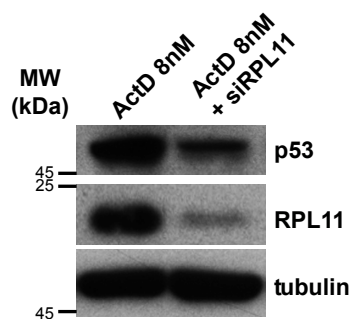

Supplementary Figure 2. Pinho M et al, 2018

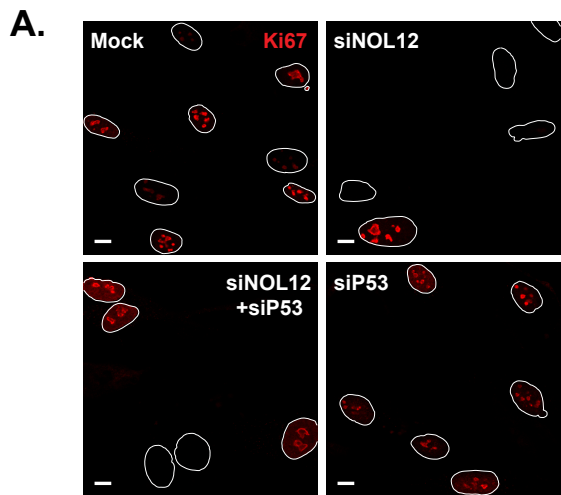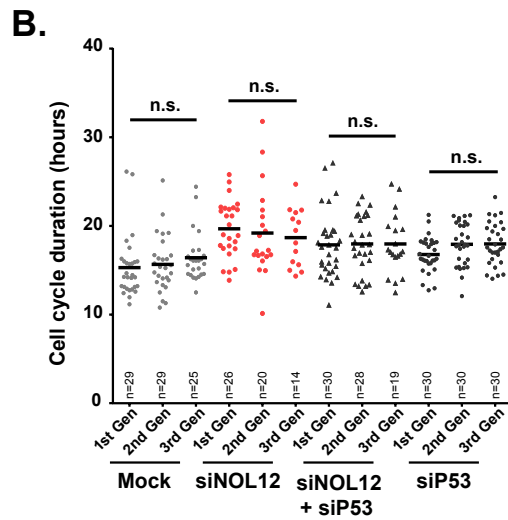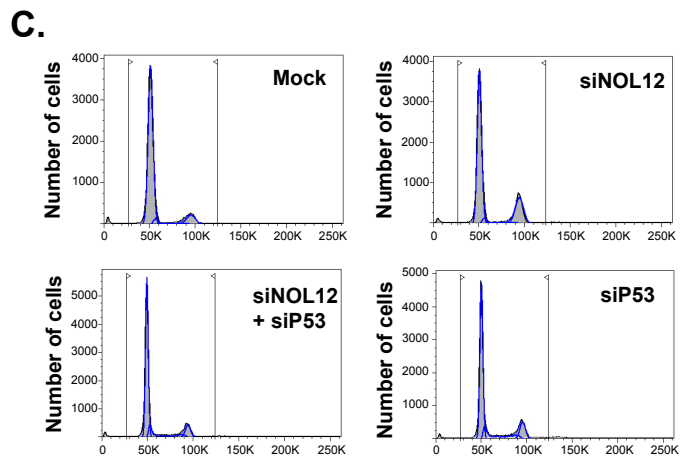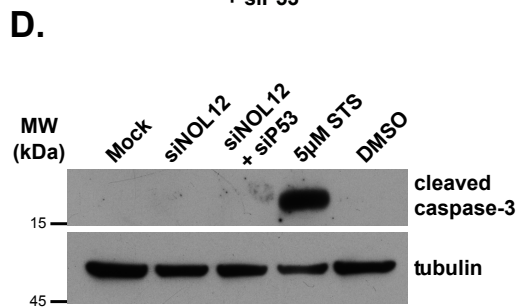

Supplementary Figure 3. Pinho et al, 2018



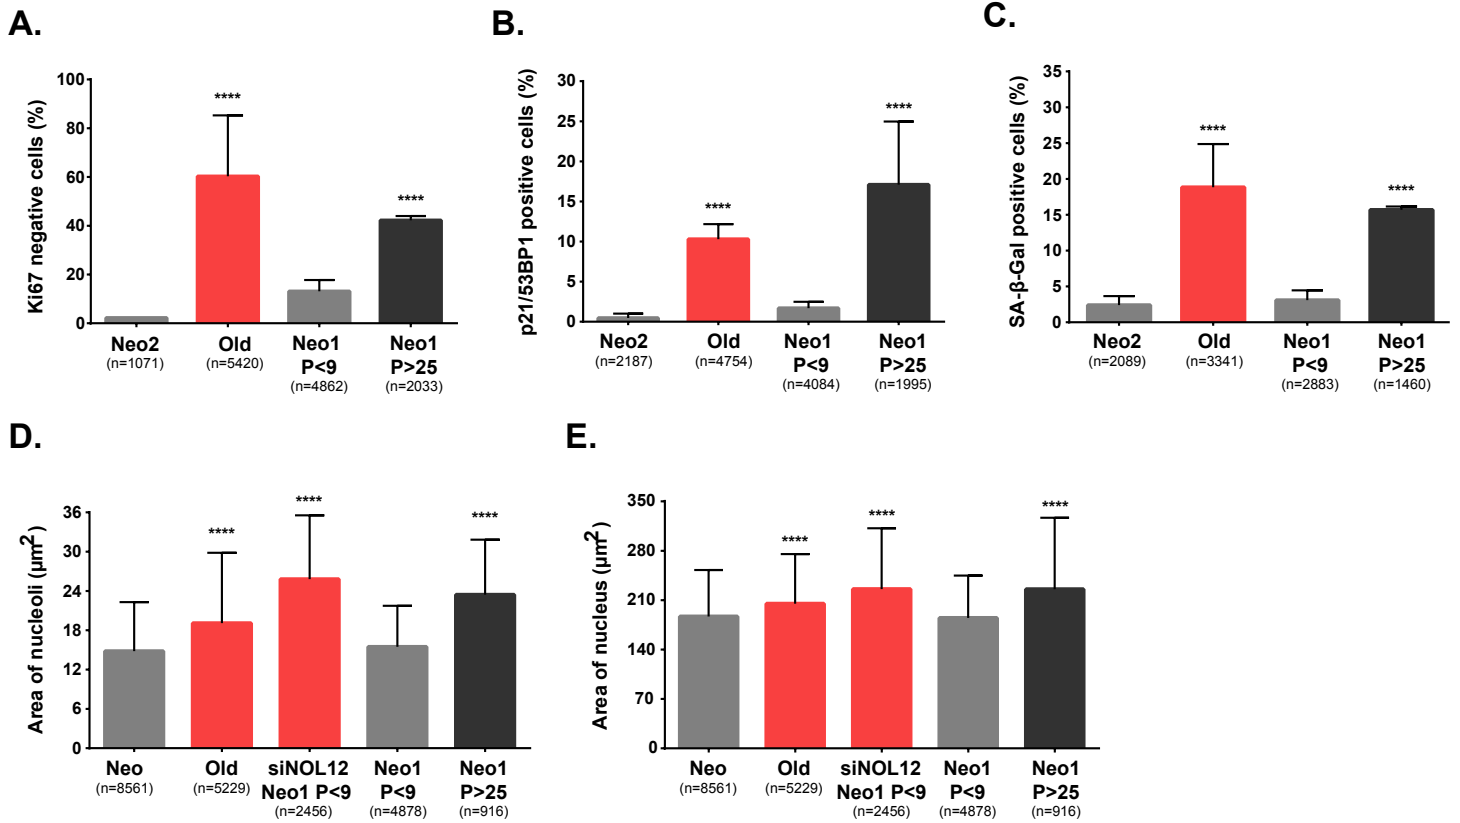

Supplementary Figure 4. Pinho et al, 2018

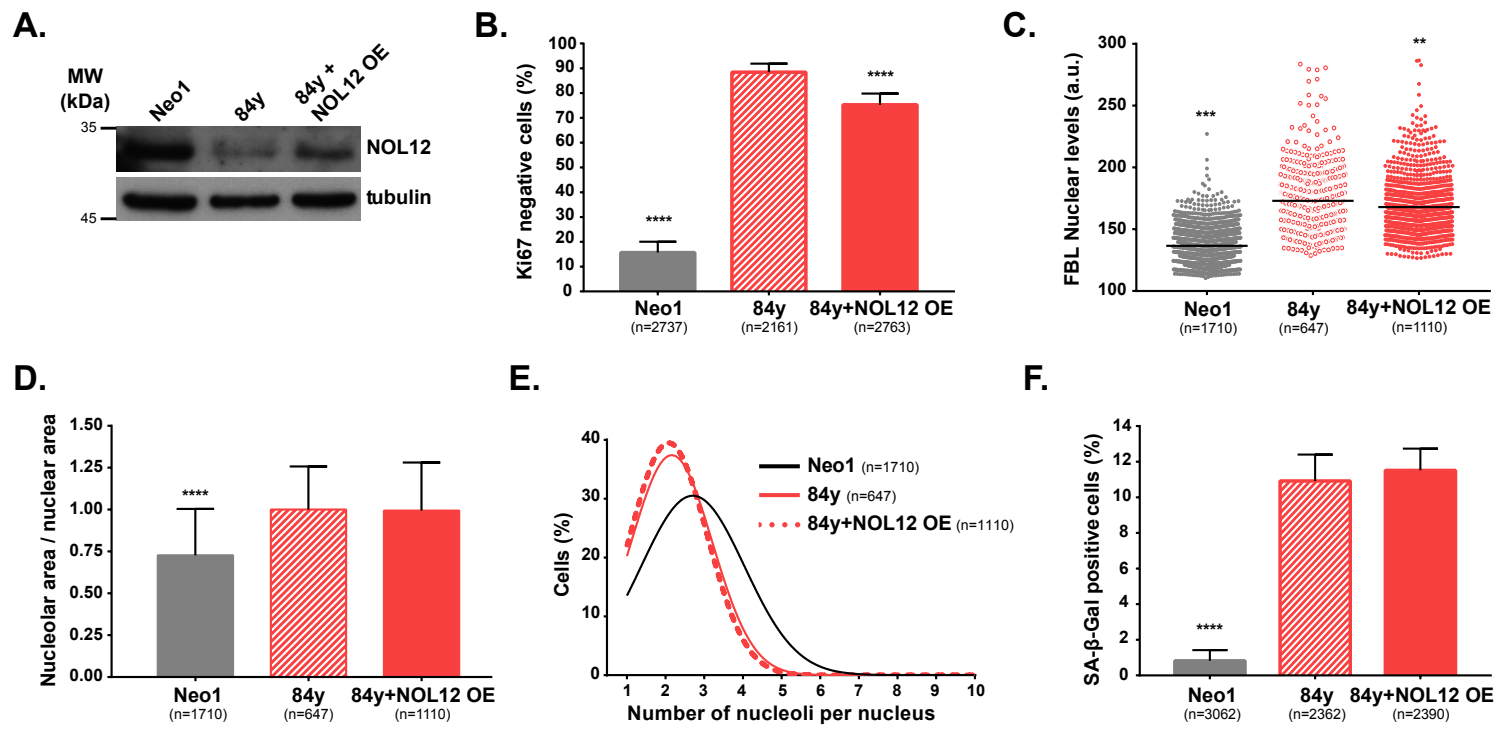

Supplementary Figure 5. Pinho et al, 2018
